# Supplementary material for: Microbial biogeography of the wombat gastrointestinal tract
Source: PeerJ journal article supplement (doi:10.7717/peerj.12982), 2022-02-23

**A)**

**Bare-nosed Wombat**

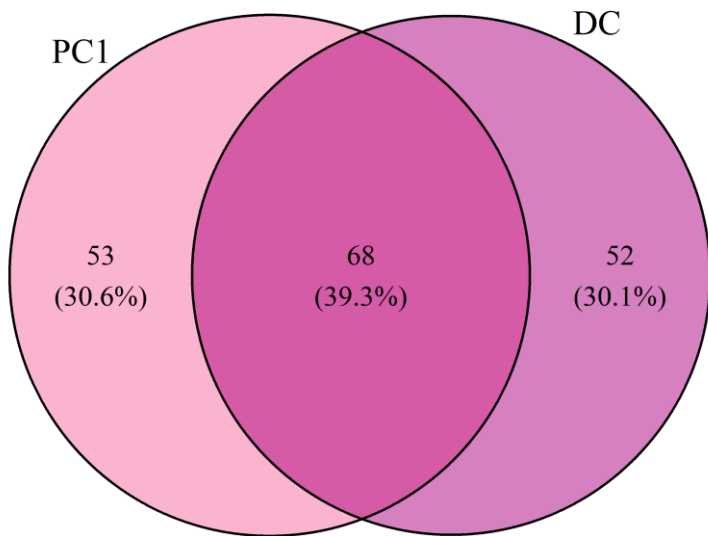

**B)**

**Southern Hairy-nosed Wombat**

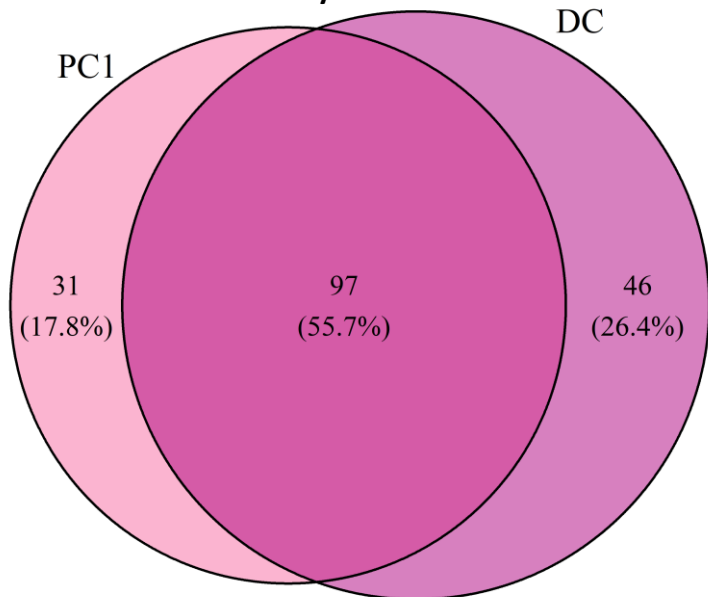

Supplement: SI_Figure_5.pdf [file SI_Figure_5.pdf]
