# Supplementary material for: Microbial biogeography of the wombat gastrointestinal tract
Source: PeerJ. 2022 Feb 23;10:e12982. doi: 10.7717/peerj.12982 (PMC8881912; doi:10.7717/peerj.12982)
Supplement: Table S1 — ANCOM results for the rarefied genera found significantly differentially abundant between the hind-gut sites at a W-statistic threshold at 0.7. [file peerj-10-12982-s006.xlsx]

## Sheet: Sheet1
Phylum;best hit	ANCOM W	DC	PC1	PC2	PC3	PC4
Bacteroidota;;;;F082	250	4685	0	7	1877	186
Bacteroidota;;;;Bacteroidales_BS11_gut_group	250	18513	10	69	8164	14848
Firmicutes;;;;UCG-010	249	6333	8	1907	5125	1547
Bacteroidota;;;SP3-e08	248	2451	0	3	453	534
Bacteroidota;;;Rikenellaceae	247	720	0	2	295	289
Firmicutes;;;;Izemoplasmataceae	245	3217	3	14	1152	480
Bacteroidota;;;;Prevotella	245	1107	41707	16694	2501	186
Bacteroidota;;;;Bacteroidales_UCG-001	243	21053	22	56	9403	10767
Verrucomicrobiota;;;;WCHB1-41	242	6050	26	788	8829	4931
Firmicutes;;;;Papillibacter	241	2303	0	0	236	39
Bacteroidota;;;;Prevotellaceae_UCG-001	241	110	15238	18860	1558	37
Bacteroidota;;;;Bacteroides	239	447	14336	2331	1228	55
Synergistota;;;;Pyramidobacter	237	339	0	0	36	41
Thermoplasmatota;;;Methanomethylophilaceae	236	300	0	0	57	37
Verrucomicrobiota;;;;Victivallaceae	236	445	0	0	117	134
Firmicutes;;;;UCG-002	231	561	3	55	321	152
Unknown	231	823	14	9	189	84
Bacteroidota;;;;Bacteroidales_RF16_group	231	2601	11000	21640	3731	24
Firmicutes;;;;Family_XIII_AD3011_group	230	854	30	228	1615	303
Firmicutes;;;;Anaerosporobacter	230	1700	39	3265	1843	0
Firmicutes;;Oscillospirales	229	254	0	10	67	36
Thermoplasmatota;;;;Candidatus_Methanomethylophilus	227	284	11	65	201	0
Firmicutes;;;;Roseburia	227	53	955	1003	781	31
Firmicutes;;;;Izemoplasmatales	226	16866	25	30	1677	122
Firmicutes;;;;Anaerovibrio	224	67	441	183	489	0
Firmicutes;;;;Subdoligranulum	223	135	307	678	279	0
Firmicutes;;;;Saccharofermentans	223	1128	0	2	102	833
Halobacterota;;;;Methanocorpusculum	222	149	10	3	11	100
Firmicutes;;;;[Eubacterium]_coprostanoligenes_group	218	2339	132	1003	6644	1556
Firmicutes;;;;Oscillibacter	216	283	159	729	536	0
Firmicutes;;;RF39	216	2240	186	1267	4922	2283
Firmicutes;;;;Anaerofustis	213	97	7	0	30	42
Firmicutes;;;;Marvinbryantia	213	75	374	238	153	1
Firmicutes;;;;Blautia	211	177	564	311	353	0
Desulfobacterota;;;;uncultured genus	210	2	115	17	0	0
Bacteroidota;;;Sphingobacteriaceae	207	3003	0	0	659	0
Firmicutes;;uncultured Clostridia	205	90	0	0	43	26
Bacteroidota;;;uncultured Marinilabiliaceae	205	919	0	0	6	333
Firmicutes;;;;Tyzzerella	203	16	420	14	18	2
Desulfobacterota;;;;Bradymonadales	201	57	0	28	223	26
Firmicutes;;;;uncultured Erysipelotrichaceae	201	202	13	7	59	147
Firmicutes;;;;UCG-012	201	8658	2	5	7	3
Firmicutes;;;Lachnospiraceae	201	8757	12097	21332	5902	450
Firmicutes;;;;Peptococcus	197	93	41	120	124	0
Campilobacterota;;;;Campylobacter	196	121	102	12	84	2
Bacteroidota;;;;DMER64	195	180	0	0	15	108
Firmicutes;;;;uncultured Ruminococcaceae	195	801	28	267	447	124
Proteobacteria;;;;Sutterella	194	55	235	110	184	0
Firmicutes;;;;[Ruminococcus]_torques_group	192	6	38	0	5	0
Firmicutes;;;Anaerovoracaceae	192	253	23	202	397	153
Firmicutes;;;;UCG-011	192	1370	2	0	530	969
Firmicutes;;;;UCG-004	192	1143	152	247	1625	904
Firmicutes;;;;Anaeroplasma	192	531	5074	1597	777	105
Cyanobacteria;;;;Chloroplast	190	23	1	11	11	34
Firmicutes;;;;Streptococcus	190	84	2246	33	10	6
Bacteroidota;;;Tannerellaceae	190	1427	50	971	958	11
Firmicutes;;;Erysipelotrichaceae	189	11	283	85	81	9
Cyanobacteria;;;;Gastranaerophilales	189	285	30	99	396	225
Bacteroidota;;Bacteroidales	187	5926	13514	20164	14427	1480
Firmicutes;;;;Christensenellaceae_R-7_group	186	9940	583	1325	4020	2255
Firmicutes;;;;Clostridia_vadinBB60_group	185	7714	161	700	3014	647
Firmicutes;unknown	183	466	0	12	162	1
Firmicutes;;;;NK4A214_group	182	2893	357	954	2596	1562
Firmicutes;;;;Selenomonas	181	30	0	0	0	24
Firmicutes;;;;NED5E9	181	581	1668	398	599	1
Firmicutes;;;;Coprococcus	177	100	869	2273	534	84
Verrucomicrobiota;;;;Z20	175	41	0	0	29	0
Proteobacteria;;;;uncultured Rhodospirillales	174	189	1153	113	155	0
Firmicutes;;;;Lachnospiraceae_NC2004_group	172	2	83	125	20	1
Actinobacteriota;;;;Enterorhabdus	171	13	72	7	17	14
Firmicutes;;;;Lachnoclostridium	168	143	352	407	558	2
Spirochaetota;;;;Treponema	166	18780	3252	4928	10124	14778
Bacteroidota;;;;Rikenellaceae_RC9_gut_group	165	24818	3057	18301	24297	13325
Bacteroidota;;;;hoa5-07d05_gut_group	164	45	0	0	237	47
Firmicutes;;;Oscillospiraceae	164	514	100	244	486	139
Bacteroidota;;;;M2PB4-65_termite_group	163	293	0	0	2	73
Firmicutes;;;;Lachnospiraceae_UCG-008	162	361	11	442	207	8
Firmicutes;;;;uncultured Peptococcaceae	160	454	125	249	390	12
Firmicutes;;;;uncultured Oscillospirales	157	5	0	0	5	7
Firmicutes;;;;Lachnospiraceae_NK4A136_group	157	137	428	208	97	0
Firmicutes;;;;Phascolarctobacterium	157	729	1042	2830	1065	93
Firmicutes;;;Christensenellaceae	156	52	3	0	4	0
Firmicutes;;;;Lachnospiraceae_ND3007_group	156	50	1044	130	84	21
Firmicutes;;;;Lachnospiraceae_UCG-006	153	6	11	36	23	0
